# Supplementary material for: Mechanical strength of RNA knot in Zika virus protects against cellular defenses
Source: Springer Nature journal article supplement (doi:10.1038/s41589-021-00829-z), 2021-07-12

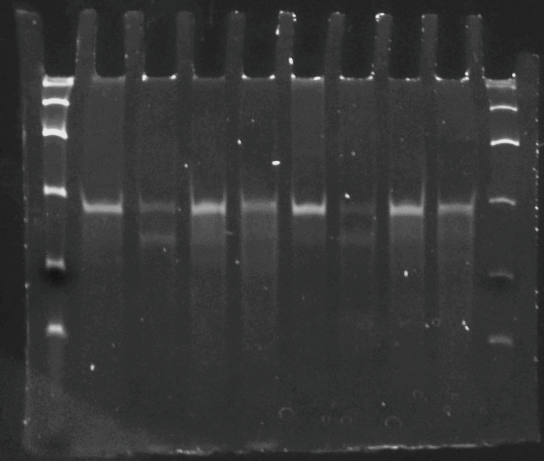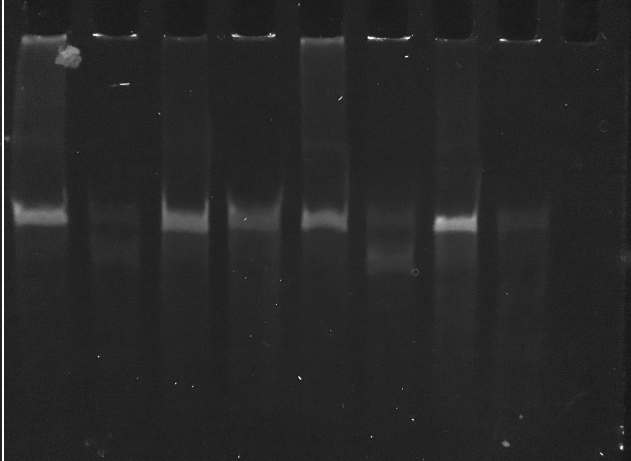

Supplement: 41589_2021_829_MOESM3_ESM.pdf [file 41589_2021_829_MOESM3_ESM.pdf]
